# Supplementary material for: Cellulose-based sponge@ZIF-8 from waste straws for water disinfection
Source: Royal Society of Chemistry journal article supplement (doi:10.1039/d3ra00243h), 2023-01-01
Supplement: d3ra00243h1.pdf [file d3ra00243h1.pdf]

## **Cellulose-based Sponge@ZIF-8 from waste straw for water disinfection**

Jingyu Li,<sup>a,b</sup> Yang Zhang <sup>a,b</sup> and Guoxin Sui <sup>\*a,b</sup>

a. Shi-Changxu Innovation Center for Advanced Materials, Institute of Metal Research, Chinese Academy of Sciences, Shenyang 110016, China.

E-mail: gxsui@imr.ac.cn

b. School of Materials Science and Engineering, University of Science and Technology of China, Shenyang 110016, China

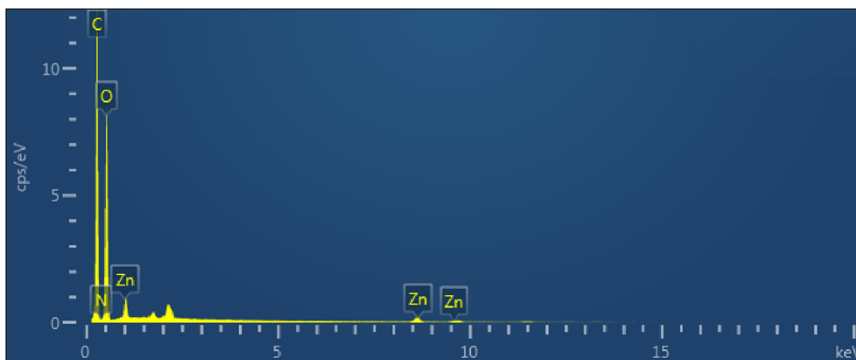

Figure S1 The elemental analysis results presenting the elemental composition for dry WCSZ composite along the straw-growth direction

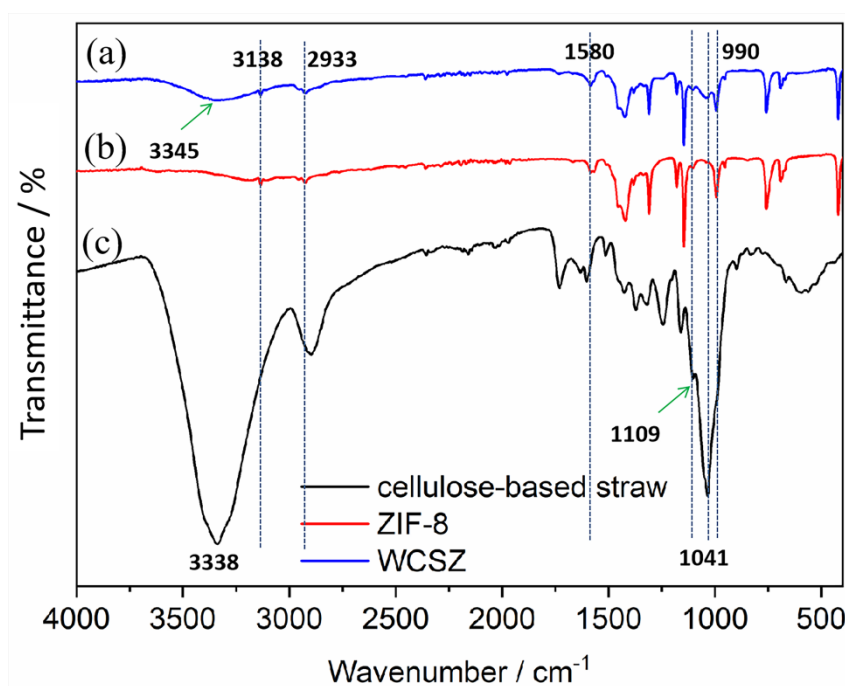

Figure S2 The FTIR results of (a) WCSZ, (b) ZIF-8 and (c) cellulose-based straw

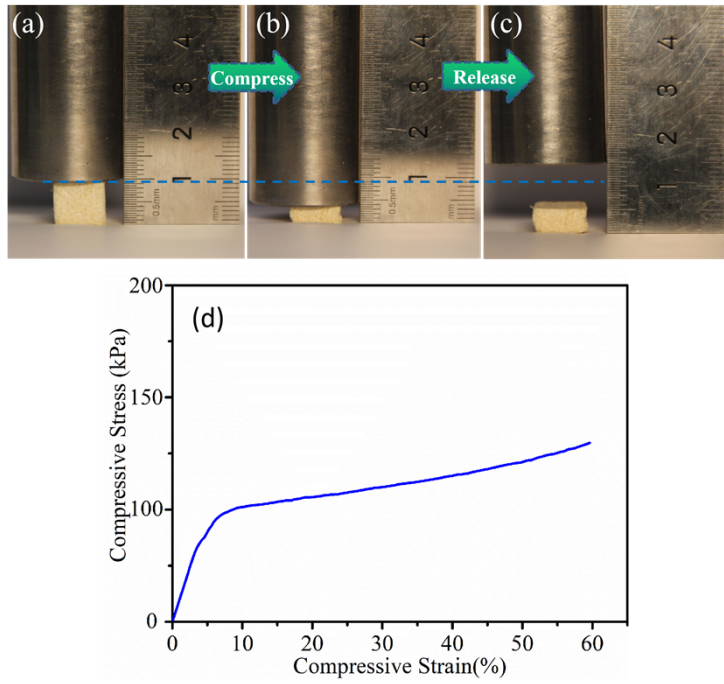

Figure S3 (a, b, c) Photographs of the dry cellulose-based straw exhibiting the irreversible compressibility perpendicular to the vascular bundle direction, (d) Compression stress-strain curves of dry cellulose-based straw under the maximum 60% strains
